# Supplementary material
Source: Research Square preprint supplement (doi:10.21203/rs.3.rs-9814396/v1)
Supplement: Supplementary file 1 [file 0378064b677f8db899ebecfc.docx]

# Supplementary Materials

**The mechanical sufficiency gap: A diagnostic framework for engineering-origin inferences in archaeology, with application to the walking-moai hypothesis**

This document describes the supplementary materials accompanying the main manuscript.

## S1. Per-moai analytic dataset

**File:** TableS1_per_moai_dataset.csv

The per-moai dataset comprises 224 statues (the analytic sample before outlier exclusion to n = 222; see Section 2.4 of the main text). Columns in the CSV file are as follows:

| Column | Description |
| --- | --- |
| OBJECTID | Schumacher (2013) original identifier |
| LOCATION_TYPE | Original Schumacher classification: QUARRY, QUARRY-BEDROCK, QUARRY NOT BEDROCK, ROAD, ISOLATED, AHU, MUSEUM |
| operational_group | Operational stage assignment used in this study: QUARRY, TRANSIT, AHU, or ISOLATED_OUTLIER (2 statues excluded from primary analysis; see Section 2.4) |
| transit_subgroup | Refinement within TRANSIT group: ROAD, ISOLATED LOW (statues with D/W ≤ 0.74 pooled into TRANSIT analytic class). Empty for non-TRANSIT statues. |
| TOTAL_LENGTH_cm | Total statue length in centimetres (where recorded; missing for statues without length measurement) |
| BASE_WIDTHcm | Base width in centimetres |
| BASE_DEPTHcm | Base depth in centimetres |
| depth_to_width | Computed D/W ratio = BASE_DEPTHcm / BASE_WIDTHcm |
| X | Longitude (decimal degrees, WGS84) |
| Y | Latitude (decimal degrees, WGS84) |
| distance_km | Distance from quarry centroid (27° 07’ 30.63” S, 109° 17’ 17.41” W, equivalent to −27.125175°, −109.288170° in decimal degrees, WGS84), in kilometres |
| EYE_SOCKETS | Categorical marker: Carved (Small/Medium/Large) or Not Carved |
| BASE_ANGLE | Categorical marker: base inclination state (as recorded in Schumacher 2013) |
| BASE_SHAPE | Categorical marker: base profile category (Contracting, Expanding [= D-form profile], Indeterminate, Missing, Parallel) |
| PECTORALS | Categorical marker: pectoral carving present/absent |
| NIPPLES_PRESENT | Categorical marker: nipples carving present/absent |
| EAR_LOBE | Categorical marker: ear lobe state |
| HAMI | Categorical marker: hami (ornamental belt) presence |
| BACKBONE_VERT | Categorical marker: backbone/vertebral feature state |
| EAR_DETAIL | Categorical marker: ear detail completeness |
| BASAL_LIPPING | Categorical marker: basal lipping state |

**Outlier identification.** Two ISOLATED statues with D/W > 0.74 (OBJECTID 859 and OBJECTID 810) are coded with operational_group = "ISOLATED_OUTLIER" in this file. The primary analytic sample (n = 222) is obtained by filtering rows where operational_group ∈ {QUARRY, TRANSIT, AHU}. The exclusion procedure is documented in Section 2.4 of the main manuscript and is fully reproducible from the data in this file. Sensitivity analyses retaining one or both outliers are reported in Section 3.8 (Table 4) of the main text.

**TRANSIT subgroup coding.** The transit_subgroup column refines the TRANSIT class into ROAD (n = 35) and ISOLATED LOW (n = 12; statues coded LOCATION_TYPE = ISOLATED with D/W ≤ 0.74). The justification for pooling ROAD and ISOLATED LOW into a single TRANSIT analytic group is reported in Section 3.6 of the main text. This column is empty for statues outside the TRANSIT group.

**Data source.** Derived from the publicly available Schumacher (2013) *Moai Database*, MA Thesis, Department of Geography, California State University, Long Beach. Original column codings preserved; categorical values reproduced verbatim from the source database.

## S2. Categorical marker test results

**File:** TableS2_marker_test_results.csv

Results of contingency tests for the ten categorical markers tested for stage discrimination, as reported in Section 3.6 of the main text. Each row corresponds to one marker tested across the three operational groups (QUARRY, TRANSIT, AHU), restricted to cases with non-missing and non-indeterminate values. Columns:

| Column | Description |
| --- | --- |
| Marker | Marker name (e.g., EYE_SOCKETS, PECTORALS) |
| Type | Marker class: morphometric or ritual/finishing |
| Meaning | Brief description of what the marker records |
| Positive level | Level treated as 1 in the binary collapse used for testing |
| Negative level(s) | Levels treated as 0 |
| n_observable QUARRY | Sample size with observable value in QUARRY group |
| n_observable TRANSIT | Sample size with observable value in TRANSIT group |
| n_observable AHU | Sample size with observable value in AHU group |
| % Positive QUARRY | Proportion in QUARRY showing the positive level |
| % Positive TRANSIT | Proportion in TRANSIT showing the positive level |
| % Positive AHU | Proportion in AHU showing the positive level |
| n_total observable | Combined observable sample size across the three groups |
| chi2 | Pearson chi-square statistic |
| df | Degrees of freedom |
| p_value | Two-sided p-value |
| Cramer_V | Effect size (Cramér’s V) |
| effect_strength | Qualitative descriptor of effect size (none / weak / moderate / strong) |
| min_expected_cell | Minimum expected cell count (chi-square reliability check) |
| discriminates_groups | Binary indicator: 1 if effect size and minimum expected cell jointly support stage discrimination, 0 otherwise |

## S3. Reproducibility

The per-moai analytic dataset (n = 222 primary analytic sample, plus two ISOLATED outliers retained for sensitivity analysis; 224 rows in total) is provided as Supplementary Table S1, supporting full reproduction of the principal statistical analyses reported in the main manuscript (Tests 1, 2, 4, and 5; Sections 3.1–3.3, 3.5–3.7). The categorical marker test results computed from this dataset are provided as Supplementary Table S2.

Test 3 frequency counts (Section 3.4 of the main manuscript) and the reproductions of Lipo and Hunt’s (2025) reported statistics (Section 3.9) are computed from the full Schumacher (2013) database (n = 961 documented moai), not from the analytic sample. The full database is publicly available through California State University, Long Beach, and is cited rather than redistributed in accordance with fair use of the cited source; its terms of use require attribution to the original author. Readers wishing to reproduce Test 3 frequency counts or the Lipo–Hunt reproductions can obtain the full database from the original source.

Statistical analysis code (Python 3.11 with pandas, numpy, scipy, statsmodels, matplotlib; random seed = 42 for bootstrap procedures) is available from the corresponding author on reasonable request.
